# Supplementary material
Source: Research Square preprint supplement (doi:10.21203/rs.3.rs-10146791/v1)
Supplement: Supplementary file 1 [file 1f94f5b452161121ba9e91b7.docx]

**Factors Associated with Deaths within Income Restricted and Supportive Housing in Denver, Colorado: A Retrospective Cohort Study**

Kathleen Joseph K, Gregory B, Haukoos J, Jones A, Rast J, Stella SA, Barocas JA, Leonard J,

Moloo J

| **eTable I.** Causes of death among individuals in housing between January 1, 2022 and October 31, 2024 (N = 255). | | | |
| --- | --- | --- | --- |
|  | | **n** | **(%)** |
| **Non-Preventable** | | 155 | (60.8) |
| Natural* | | 155 | (60.8) |
|  | Heart disease | 34 | (21.9) |
|  | Infection | 24 | (15.5) |
|  | Complications of alcohol use | 21 | (13.6) |
|  | Malignancy | 20 | (12.9) |
|  | Pulmonary disease | 19 | (12.3) |
|  | Hepatic failure | 15 | (9.7) |
|  | Stroke | 7 | (4.5) |
|  | Other+ | 15 | (9.7) |
| **Preventable** | | 90 | (35.3) |
| Accident* | | 83 | (32.6) |
|  | Overdose | 73 | (88.0) |
|  | Drowning or traumatic injury | 10 | (12.0) |
| Homicide | | <5 | (S) |
| Suicide | | S | (S) |
| **Unknown** | | 10 | (3.9) |
| **Abbreviations:** S, suppressed  *Percentages of natural and accidental causes of death are calculated using the total number of natural and accidental deaths, respectively, as the denominators.  + Other causes of natural death include complications of diabetes mellitus, hemorrhage, renal disease, and gastrointestinal disease (bowel perforation, bowel ischemia, pancreatitis)  Note: Given the small sample size, in order to protect confidentiality, values with n < 5 and the next lowest value are suppressed. | | | |

| **eTable II**. Multivariable logistic regression of factors associated with avoidable death (primary outcome) among individuals receiving housing services subset by service type from January 1, 2022 through October 31, 2024 (N = 255). | | | | | | | | | |
| --- | --- | --- | --- | --- | --- | --- | --- | --- | --- |
|  | | **Behavioral Health and Case Management Services** | | | | **Medical Services** | | | |
|  | | **All Deaths**  (N = 255) | | **Patients with Substance Use Disorder**  (N = 159) | | **All Deaths**  (N = 255) | | **Patients with Substance Use Disorder**  (N = 159) | |
| **Variable** | | **aOR** | **(95% CI)** | **aOR** | **(95% CI)** | **aOR** | **(95% CI)** | **aOR** | **(95% CI)** |
| Age | | 0.91 | (0.88, 0.95) | 0.93 | (0.89, 0.97) | 0.91 | (0.88, 0.94) | 0.93 | (0.88, 0.97) |
| Female sex | | 0.88 | (0.44, 1.78) | 0.67 | (0.26, 1.75) | 0.85 | (0.42, 1.71) | 0.67 | (0.26, 1.72) |
| Race | |  |  |  |  |  |  |  |  |
|  | American Indian or Alaskan Native | 3.00 | (1.13, 7.98) | 3.58 | (0.91, 14.13) | 3.04 | (1.14, 8.09) | 3.34 | (0.89, 12.60) |
|  | Black or African American | 2.06 | (0.94, 4.54) | 2.94 | (1.03, 8.36) | 2.31 | (1.04, 5.12) | 3.27 | (1.14, 9.36) |
|  | Other | 4.46 | (1.27, 15.60) | 7.57 | (1.51, 37.83) | 4.79 | (1.34, 17.11) | 6.35 | (1.30, 31.04) |
|  | White or Caucasian | Ref | - | Ref | - | Ref | - | Ref | - |
|  | Unknown | 2.17 | (0.47, 9.94) | 0.24 | (0.01, 4.76) | 2.13 | (0.48, 9.45) | 0.25 | (0.01, 4.95) |
| Hispanic ethnicity | | 0.50 | (0.19, 1.32) | 0.55 | (0.16, 1.88) | 0.52 | (0.20, 1.39) | 0.66 | (0.20, 2.16) |
| Payor | |  |  |  |  |  |  |  |  |
|  | Medicaid | 0.50 | (0.20, 1.27) | 0.45 | (0.14, 1.45) | 0.44 | (0.17, 1.16) | 0.41 | (0.12, 1.34) |
|  | Medicare | 0.79 | (0.26, 2.41) | 0.31 | (0.07, 1.37) | 0.80 | (0.26, 2.51) | 0.29 | (0.06, 1.32) |
|  | Private | Ref |  | Ref | - | Ref | - | Ref | - |
|  | Self-pay | 0.54 | (0.18, 1.66) | 0.51 | (0.12, 2.12) | 0.61 | (0.20, 1.85) | 0.65 | (0.16, 2.71) |
| Program enrollment | |  |  |  |  |  |  |  |  |
|  | Permanent Supportive Housing | 1.48 | (0.52, 4.22) | 2.58 | (0.65, 10.22) | 1.37 | (0.54, 3.47) | 2.10 | (0.61, 7.21) |
|  | Affordable Housing | 1.55 | (0.78, 3.08) | 1.51 | (0.64, 3.55) | 1.68 | (0.85, 3.34) | 1.76 | (0.74, 4.16) |
|  | Community Services | 1.15 | (0.43, 3.11) | 1.67 | (0.45, 6.26) | 1.29 | (0.49, 3.45) | 1.97 | (0.54, 7.20) |
|  | Health Services Programs | 1.09 | (0.53, 2.24) | 1.38 | (0.55, 3.46) | 0.83 | (0.36, 1.94) | 0.93 | (0.32, 2.69) |
|  | Operations Services | 1.76 | (0.67, 4.59) | 4.57 | (1.35, 15.46) | 1.81 | (0.68, 4.82) | 4.96 | (1.42, 17.34) |
| Service availability and successful engagement | |  |  |  |  |  |  |  |  |
|  | No availability, no success | Ref | - | Ref | - | Ref | - | Ref | - |
|  | Low availability, low success | 0.57 | (0.13, 2.56) | 0.55 | (0.08, 3.98) | 1.28 | (0.42, 3.92) | 1.54 | (0.37, 6.42) |
|  | Low availability, high success | 0.78 | (0.29, 2.11) | 0.59 | (0.16, 2.27) | 1.07 | (0.33, 3.50) | 1.14 | (0.26, 5.06) |
|  | High availability, low success | 0.60 | (0.10, 3.65) | 0.13 | (0.01, 2.19) | 1.72 | (0.56, 5.29) | 2.32 | (0.54, 9.93) |
|  | High availability, high success | 0.83 | (0.28, 2.45) | 0.63 | (0.15, 2.60) | 1.96 | (0.59, 6.44) | 1.92 | (0.44, 8.43) |
| Substance use | | 1.45 | (0.87, 3.54) | - | - | 1.65 | (0.81, 3.37) | - | - |
| No substance use treatment | | 2.82 | (1.19, 6.68) | 2.97 | (1.17, 7.53) | 2.91 | (1.24, 6.83) | 3.35 | (1.33, 8.42) |
| **Abbreviations:** aOR, adjusted odds ratio; CI, confidence interval | | | | | | | | | |
